# Supplementary material for: Outcome of medial hamstring lengthening in children with spastic paresis: A biomechanical and morphological observational study
Source: PLOS journal article supplement (doi:10.1371/journal.pone.0192573), 2018-02-06
Supplement: S1 (10.1371/journal.pone.0192573.s001) [file journal.pone.0192573.s001]

**S1 Table. Individual patient information, surgery, adverse events and rehabilitation program**

| Subject:<br>Gender<br>Age<br>Etiology<br>Length<br>Weight<br>GMFCS                      | Surgery                                                                                                                                                                                                                                                                                                                                                     | Adverse events                                                                           | Rehabilitation / additional treatment                                                                                                                                                                                                                                                                                                                                                                                          |
|-----------------------------------------------------------------------------------------|-------------------------------------------------------------------------------------------------------------------------------------------------------------------------------------------------------------------------------------------------------------------------------------------------------------------------------------------------------------|------------------------------------------------------------------------------------------|--------------------------------------------------------------------------------------------------------------------------------------------------------------------------------------------------------------------------------------------------------------------------------------------------------------------------------------------------------------------------------------------------------------------------------|
| 1:<br>female<br>10.6 years<br>cerebral palsy<br>146 cm<br>46 kg<br>GMFCS III            | Both legs distal medial hamstring lengthening, adductor and psoas release;<br>left leg: hemi-epiphysiodesis                                                                                                                                                                                                                                                 | Neuropathic pain after epidural painmanagement; morphine pump<br>GMFCS III=><br>GMFCS IV | First 6 weeks: immobilization in knee extension brace left leg (23 hours per day); first half year three to four times a week physiotherapy including strengthening, mobilization, pain rehabilitation and hydrotherapy; second half year after surgery two to three times per week physiotherapy including training on parallel bars, transfers training and biking                                                           |
| 2:<br>male<br>12.7 years<br>hereditary spastic paresis<br>136 cm<br>27 kg<br>GMFCS III  | Both legs distal medial hamstring lengthening and hemi-epiphysiodesis; right leg: exorotating femur osteotomy, endorotating tibia osteotomy and aponeurotic lengthening of triceps surae (Vulpus); left leg: aponeurotic lengthening of triceps surae (Vulpus) and triple arthrodesis foot;<br>After one week of first SEMLS: triple arthrodesis right foot |                                                                                          | First 6 weeks: no-weight bearing; immobilization in knee extension brace both legs (23 hours per day); Till half year after SEMLS four times a week physiotherapy including gait training, mobilization, and strengthening; after 12 weeks therapy included two times training in water;<br>Eight months after SEMLS: Botuline toxin A treatment: psoas, adductors, rectus femoris, flexor dig. brevis and flexor dig. longus; |
| 3:<br>female<br>17.2 years<br>cerebral palsy<br>154 cm<br>47 kg<br>GMFCS III            | Both legs distal medial hamstring lengthening and supracondylar extension osteotomy; Right leg: aponeurotic lengthening of triceps surae (Vulpus)                                                                                                                                                                                                           |                                                                                          | First 8 weeks immobilization in knee extension brace both legs (23 hours per day); inpatient rehabilitation nine weeks including gait training, mobilization, and strengthening; Till half year after SEMLS two times a week physiotherapy, then one time.                                                                                                                                                                     |
| 4:<br>male<br>15.8 years<br>cerebral palsy<br>151 cm<br>53 kg<br>GMFCS II               | Both legs distal medial hamstring lengthening three month prior to SEMLS;<br>SEMLS: supracondylar extension osteotomy; patellar tendon shortening; both feet: fusion of calcaneocuboid joints                                                                                                                                                               |                                                                                          | First 9 weeks: immobilization in knee extension brace both legs (23 hours per day); one hour mobilization and standing exercises; followed by knee extension brace for 2-3 hours and three sessions of physiotherapy every week, including gait training, mobilization and strengthening.<br>After SEMLS: 12 weeks of inpatient rehabilitation.<br>Two years after SEMLS: Rectus release both legs                             |
| 5:<br>female<br>11.2 years<br>hereditary spastic paresis<br>151 cm<br>46 kg<br>GMFCS II | Both legs distal medial hamstring lengthening and distal femoral anterior guided growth (hemi-epiphysiodesis)                                                                                                                                                                                                                                               | Pain at growth plate at location of fixation plates till half year after surgery         | First 12 weeks: immobilization in removable knee extension brace both legs (8 hours per night); combined with five times a week physiotherapy including gait training, mobilization, and strengthening. Till half year after SEMLS two times a week physiotherapy, then one time. Biking at five weeks after SEMLS.                                                                                                            |
| 6:<br>male<br>15.2 years<br>cerebral palsy<br>176 cm<br>61 kg<br>GMCS III               | Both legs distal medial hamstring lengthening;<br>right leg hemi-epiphysiodesis, exorotating femur osteotomy, endorotating tibia osteotomy; Left leg: hemi-epiphysiodesis, triple arthrodesis foot;<br>After four weeks of first SEMLS: triple arthrodesis right foot                                                                                       | Stage 4 pressure ulcer surgically treated                                                | First 8 weeks: immobilization in knee extension brace both legs (23 hours per day); 6 weeks below-knee cast for mobilization, 8 hours per night knee extension braces, inpatient rehabilitation 12 weeks including gait training, mobilization, and strengthening; Till half year after SEMLS three times a week physiotherapy, then one time. Wheelchair sports training four times a week.                                   |
